# Supplementary material for: Artificial intelligence and the future of psychiatry: Qualitative findings from a global physician survey
Source: PubMed Central journal article supplement — Digit Health. 2020 Oct 27;6:2055207620968355. doi: 10.1177/2055207620968355 (PMC7597571; doi:10.1177/2055207620968355), 2020-10-27

## **Appendix 1:**

### **AI & the Future of Psychiatry: Survey Questions**

#### **Section I: Technology and the Future of Psychiatry**

**This survey focuses on your opinions of artificial intelligence and the future of psychiatric clinical practice.**

**Some people believe that current and future innovations in artificial intelligence (AI)/machine learning will lead to significant changes in medical practice and that computers will one day EVEN replace the work of PSYCHIATRISTS. Others deny that new technologies will ever have the capacity to replace this work.**

**We are interested in your views on whether future technology will be able to perform various medical tasks as well as or better than the average PSYCHIATRIST.**

**In the following questions, we are interested in whether you believe technology will be able to FULLY REPLACE – NOT MERELY AID – PSYCHIATRISTS in performing these tasks.**

**The questions begin on the following screen.**

**In your opinion what is the likelihood that future technology will able to replace human doctors to perform these tasks as well as or better than the average PSYCHIATRIST?**

|                                                                                  | [Q1]                      |                       |                       |                        |                       |                       | [Q1a]                                                                                                                                         |
|----------------------------------------------------------------------------------|---------------------------|-----------------------|-----------------------|------------------------|-----------------------|-----------------------|-----------------------------------------------------------------------------------------------------------------------------------------------|
|                                                                                  | Extremel<br>y<br>unlikely | Unlikel<br>y          | Somewha<br>t unlikely | Somew<br>hat<br>likely | Likely                | Extremel<br>y likely  | When, in your estimation, will technology have the capacity to replace the average PSYCHIATRIST in performing this task?                      |
| Interview psychiatric patients in a range of settings to obtain medical history. | <input type="radio"/>     | <input type="radio"/> | <input type="radio"/> | <input type="radio"/>  | <input type="radio"/> | <input type="radio"/> | [Show drop down with the following options: 0-4 years/5 to 10 years from now/11 to 25 years from now/26-50 years/More than 50 years from now] |
| Perform a mental status examination.                                             | <input type="radio"/>     | <input type="radio"/> | <input type="radio"/> | <input type="radio"/>  | <input type="radio"/> | <input type="radio"/> | [Show drop down with the following options: 0-4 years/5 to 10 years from now/11 to 25 years from now/26-50 years/More than 50 years from now] |
| Synthesize patient information to reach diagnoses.                               | <input type="radio"/>     | <input type="radio"/> | <input type="radio"/> | <input type="radio"/>  | <input type="radio"/> | <input type="radio"/> | [Show drop down with the following options: 0-4 years/5 to 10 years from now/11 to 25 years from now/26-50 years/More than 50 years from now] |
| Analyze patient information to detect suicidal thoughts.                         | <input type="radio"/>     | <input type="radio"/> | <input type="radio"/> | <input type="radio"/>  | <input type="radio"/> | <input type="radio"/> | [Show drop down with the following options: 0-4 years/5 to 10 years from now/11 to 25 years from now/26-50 years/More than 50 years from now] |
| Analyze patient information to detect acute homicidal thoughts.                  | <input type="radio"/>     | <input type="radio"/> | <input type="radio"/> | <input type="radio"/>  | <input type="radio"/> | <input type="radio"/> | [Show drop down with the following options: 0-4 years/5 to 10 years from now/11 to 25 years from now/26-50 years/More than 50 years from now] |
| Analyze patient information to establish prognoses.                              | <input type="radio"/>     | <input type="radio"/> | <input type="radio"/> | <input type="radio"/>  | <input type="radio"/> | <input type="radio"/> | [Show drop down with the following options: 0-4 years/5 to 10 years from now/11 to 25 years from                                              |

|                                                                                       |                       |                       |                       |                       |                       |                       |                                                                                                                                               |
|---------------------------------------------------------------------------------------|-----------------------|-----------------------|-----------------------|-----------------------|-----------------------|-----------------------|-----------------------------------------------------------------------------------------------------------------------------------------------|
|                                                                                       |                       |                       |                       |                       |                       |                       | now/26-50 years/More than 50 years from now]                                                                                                  |
| <b>Evaluate when to refer patients to outpatient versus inpatient treatment.</b>      | <input type="radio"/> | [Show drop down with the following options: 0-4 years/5 to 10 years from now/11 to 25 years from now/26-50 years/More than 50 years from now] |
| <b>Formulate personalized medication and/or therapy treatment plans for patients.</b> | <input type="radio"/> | [Show drop down with the following options: 0-4 years/5 to 10 years from now/11 to 25 years from now/26-50 years/More than 50 years from now] |
| <b>Provide empathetic care to patients.</b>                                           | <input type="radio"/> | [Show drop down with the following options: 0-4 years/5 to 10 years from now/11 to 25 years from now/26-50 years/More than 50 years from now] |
| <b>Provide documentation (e.g., update medical records) about patients.</b>           | <input type="radio"/> | [Show drop down with the following options: 0-4 years/5 to 10 years from now/11 to 25 years from now/26-50 years/More than 50 years from now] |

---

## Section II. Impact on Psychiatrist's Jobs

1. In 25 years, of the following options, in your opinion what is the likely impact of artificial intelligence/machine learning on the work of PSYCHIATRISTS.

No influence (jobs will remain unchanged)

 1

Minimal influence (jobs will change slightly)

 2

Moderate influence (jobs will change substantially)

 3

Extreme influence (jobs become obsolete)

 4

1b. After Q1S2 those who answer "Minimal Influence" or "Moderate influence" or "Extreme influence" should be asked:

Please briefly describe the way(s) you believe artificial intelligence/machine learning will change PSYCHIATRISTS' jobs in the next 25 years.

Optional. no max characters

2. Do you believe the benefits of artificial intelligence/machine learning to the field psychiatry will outweigh the possible risks/harms?

[Choices are Yes or No or Uncertain]

**2b. Please provide any brief comments you may have about the potential benefits and/or potential harms of artificial intelligence/machine learning in psychiatry.**

Optional , no max characters



### **Section III: Psychiatrist Demographics**

**In this section we will ask demographic questions.**

**A. Please select your gender.**

**[Male or Female]**

- **Other [Please specify]**
- **Prefer not to say**

**B. Please select your age range.**

**[Categories include:**

**25-34**

**35-44**

**45-54**

**55-64**

**65 and over]**

**C. What year did you first start practicing medicine? Please select year.**

**[Years listed as options, range 1950 to 2019]**

**D. Where did you study medicine? Please select country.**

[List of countries provided as options]

**Other: Please specify \_\_\_\_\_**

**E. Please select your race/ethnicity. [QUESTION IS OPTIONAL]**

[Categories to include:

- Asian
- Black/African/Caribbean
- Mixed/Multiple Ethnic Groups
- White
- Other ethnic group not listed
- Prefer not to say

**F. How many hours do you work per week (including time spent seeing patients, home visits, administrative tasks, etc.)?**

[Options: Fewer than 10 hours; 10-20 hours; 20-30 hours; 30-40 hours; 40-50 hours; More than 50]

**G. On average how many patients do you interact with per day?**

**Please enter number.**

\_\_\_\_\_ patients

[Range 0-999]

**H. Country where you practice. Please select.**

[list of countries to be provided] ]

**I. Please select your type of psychiatric practice.**

[Private practice, Public clinic, Academia]

## **Section IV: Any Other Comments**

**We value your opinion. If you have any other comments about this survey topic or recommendations for other questions we should include, please add them below.**



Supplement: sj-pdf-1-dhj-10.1177_2055207620968355.pdf [file sj-pdf-1-dhj-10.1177_2055207620968355.pdf]
